# Supplementary material for: Differential hepatic distribution of insulin receptor substrates causes selective insulin resistance in diabetes and obesity
Source: PubMed Central journal article supplement (PMC5059684; doi:10.1038/ncomms12977), 2016-10-06
Supplement: ncomms12977-s1.pdf [file ncomms12977-s1.pdf]

# Supplementary Figure 1

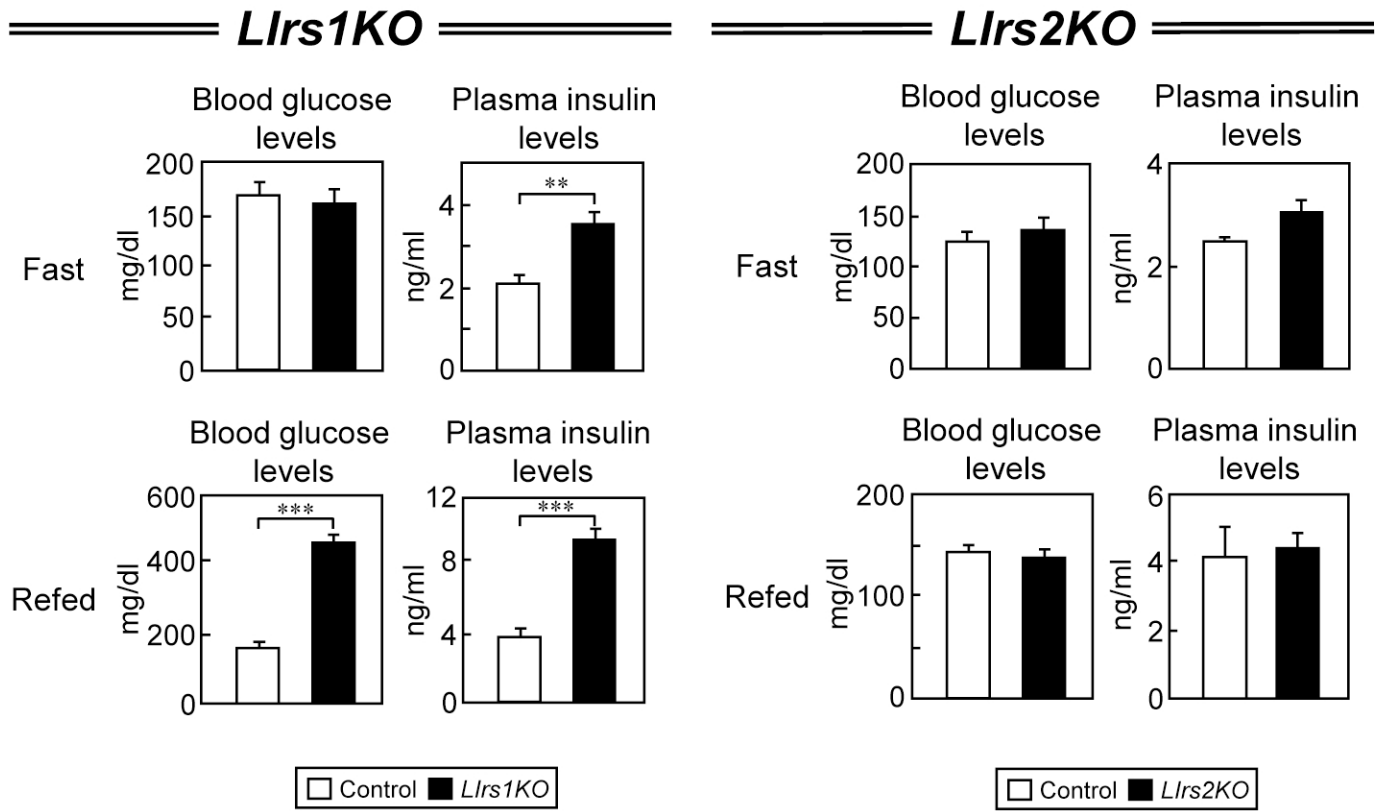

## Supplementary Figure 1.

### Blood glucose and plasma insulin levels in the *Lirs1KO* and *Lirs2KO* mice

Blood glucose and plasma insulin levels in the *Lirs1KO* and *Lirs2KO* mice under the fasting and fed conditions (n = 5-10).

Results are expressed as mean  $\pm$  s.e.m. \*\* $P < 0.01$ , \*\*\* $P < 0.001$ .

## Supplementary Figure 2

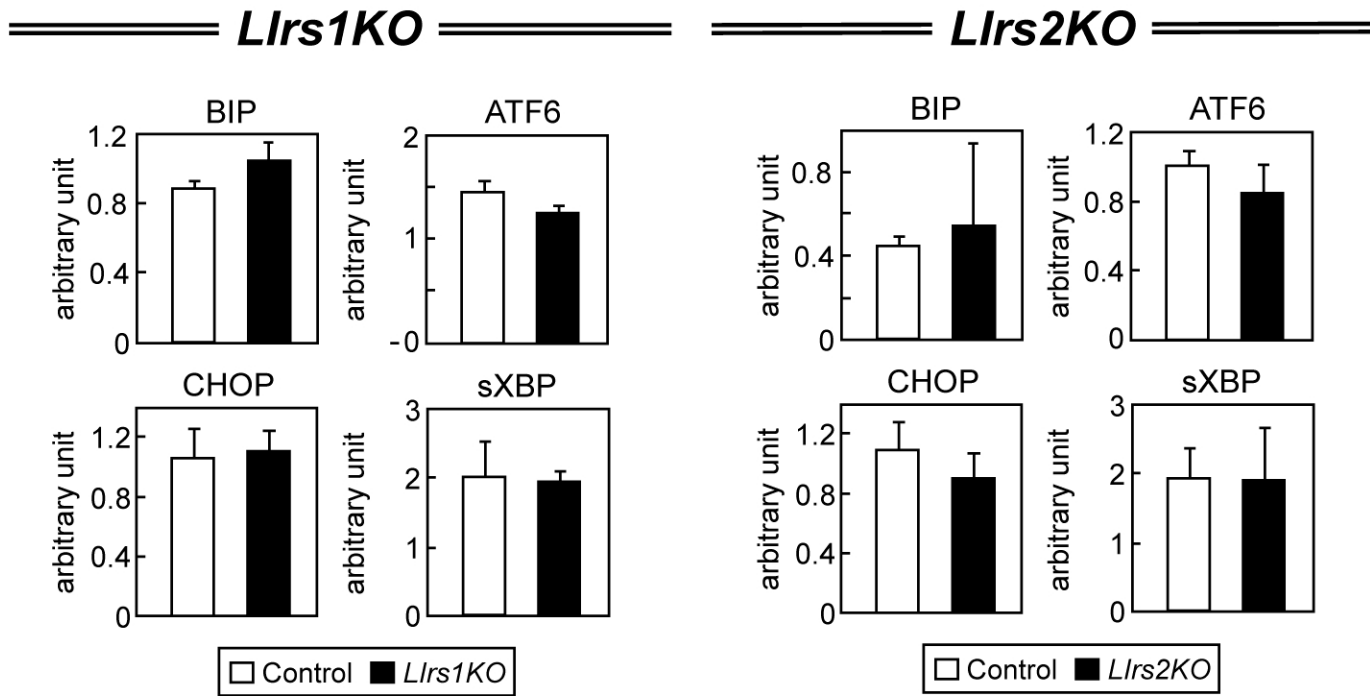

### Supplementary Figure 2.

The expressions of BIP, CHOP, ATF6 and sXBP were not significantly different between the control and *Lirs1KO* mice or control and *Lirs2KO* mice.

Expression levels of the ER stress marker genes in the the *Lirs1KO* and *Lirs2KO* mice (n = 10-12). Results are expressed as mean  $\pm$  s.e.m.

# Supplementary Figure 3

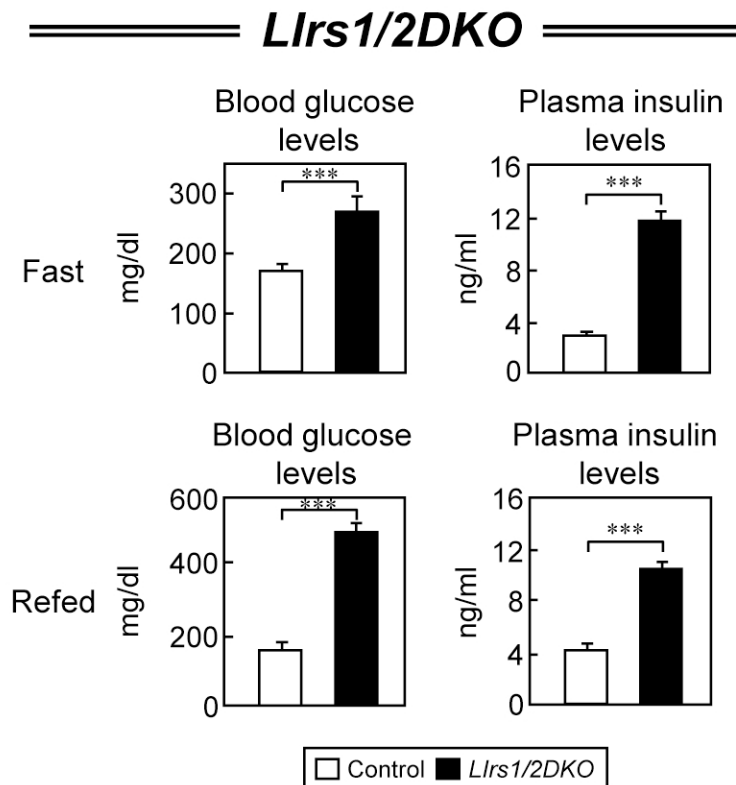

## Supplementary Figure 3.

### Blood glucose and plasma insulin levels were increased in the *Lirs1/2DKO* mice

Blood glucose and plasma insulin levels in the *Lirs1/2DKO* mice under the fasting and fed conditions (n = 5-12).

Results are expressed as mean  $\pm$  s.e.m. \*\*\* $P < 0.001$ .

# Supplementary Figure 4

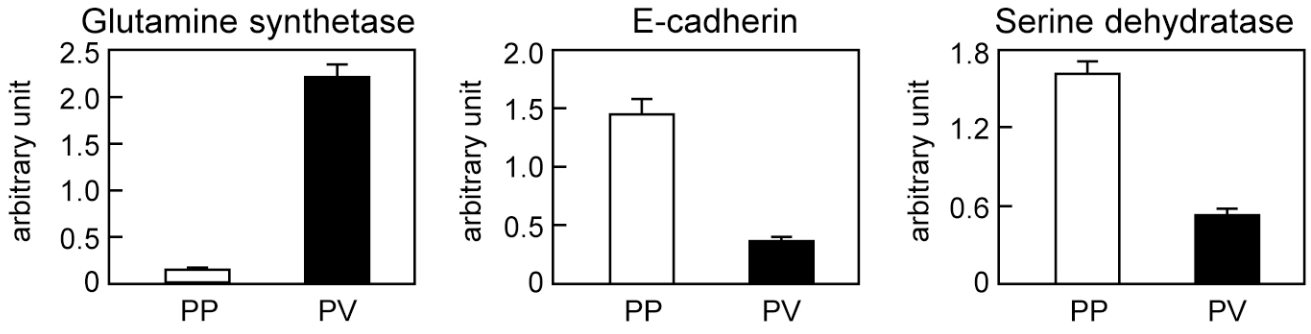

## Supplementary Figure 4.

### Expression levels of glutamine synthetase, E-cadherin and serine dehydratase in the hepatic PP and PV zones

Real-time RT-PCR analysis to determine the expression levels of glutamine synthetase, E-cadherin and serine dehydratase in the hepatocytes of the PP and PV zones in the livers obtained from mice reared on NC diet (n = 6-8).

Results are expressed as mean  $\pm$  s.e.m.

# Supplementary Figure 5

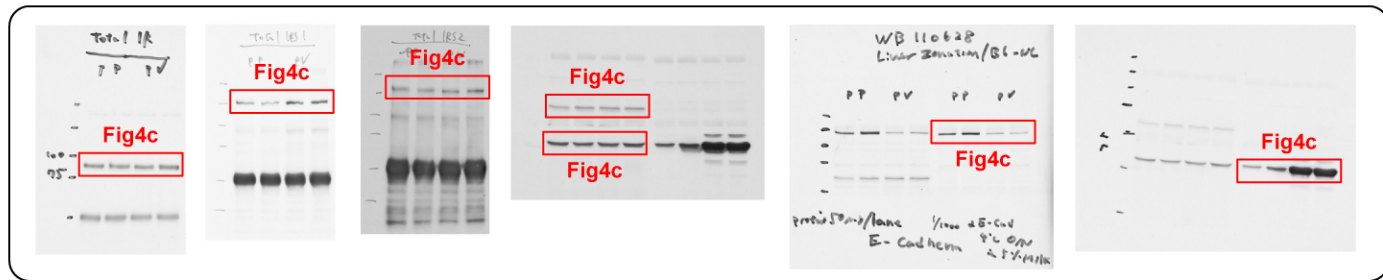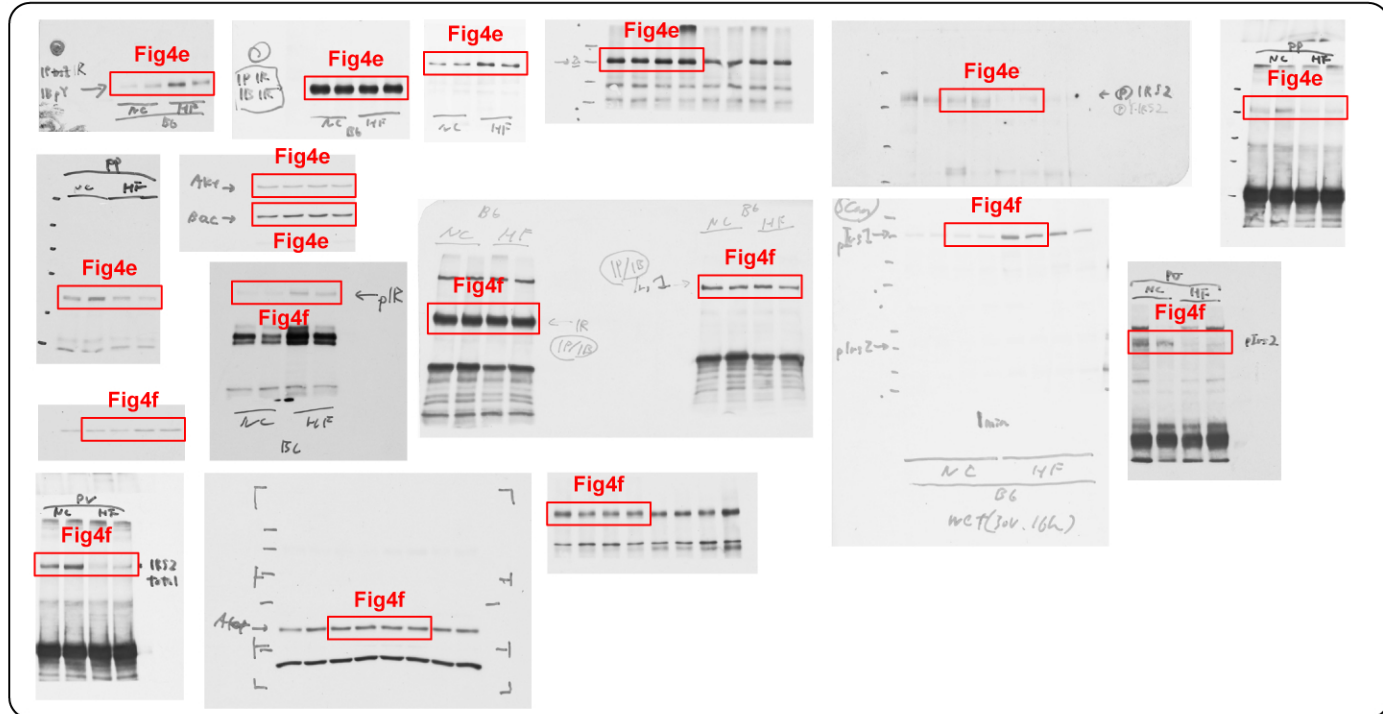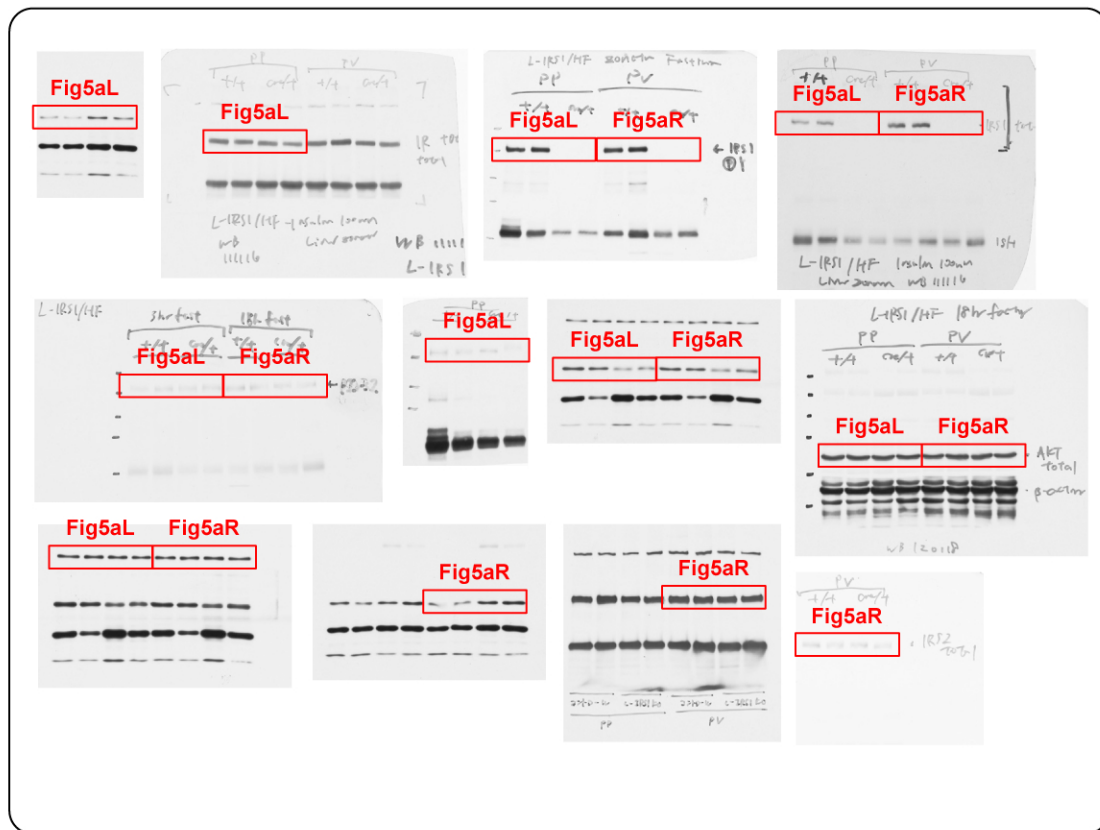

# Supplementary Figure 5.

Uncropped Western blots related to Figure 4, 5

# Supplementary Figure 6

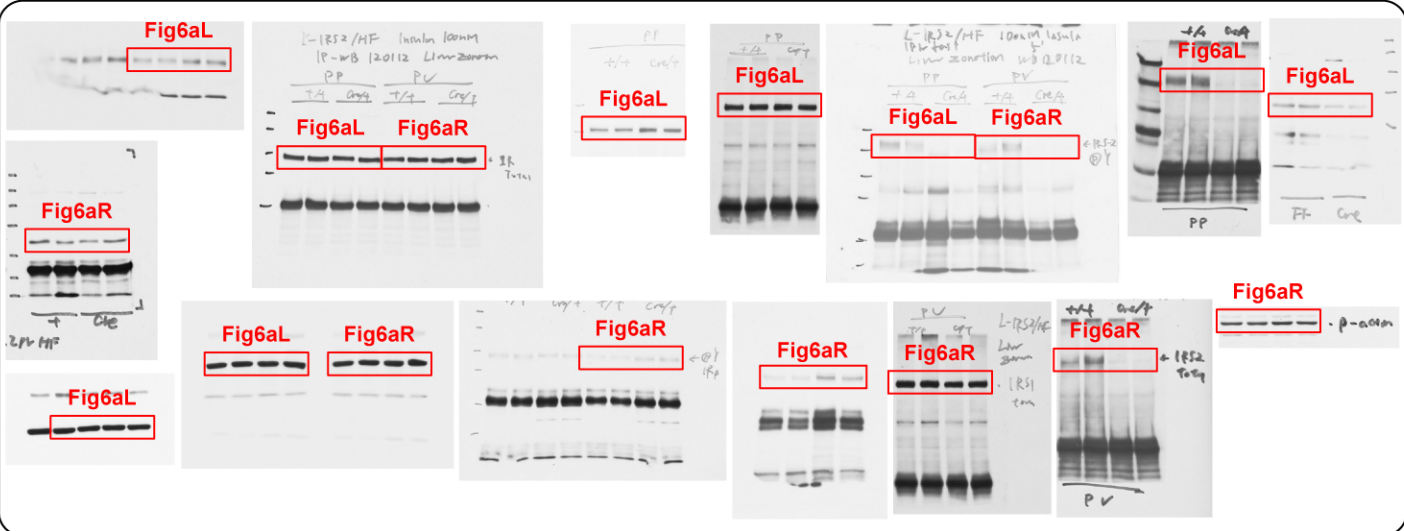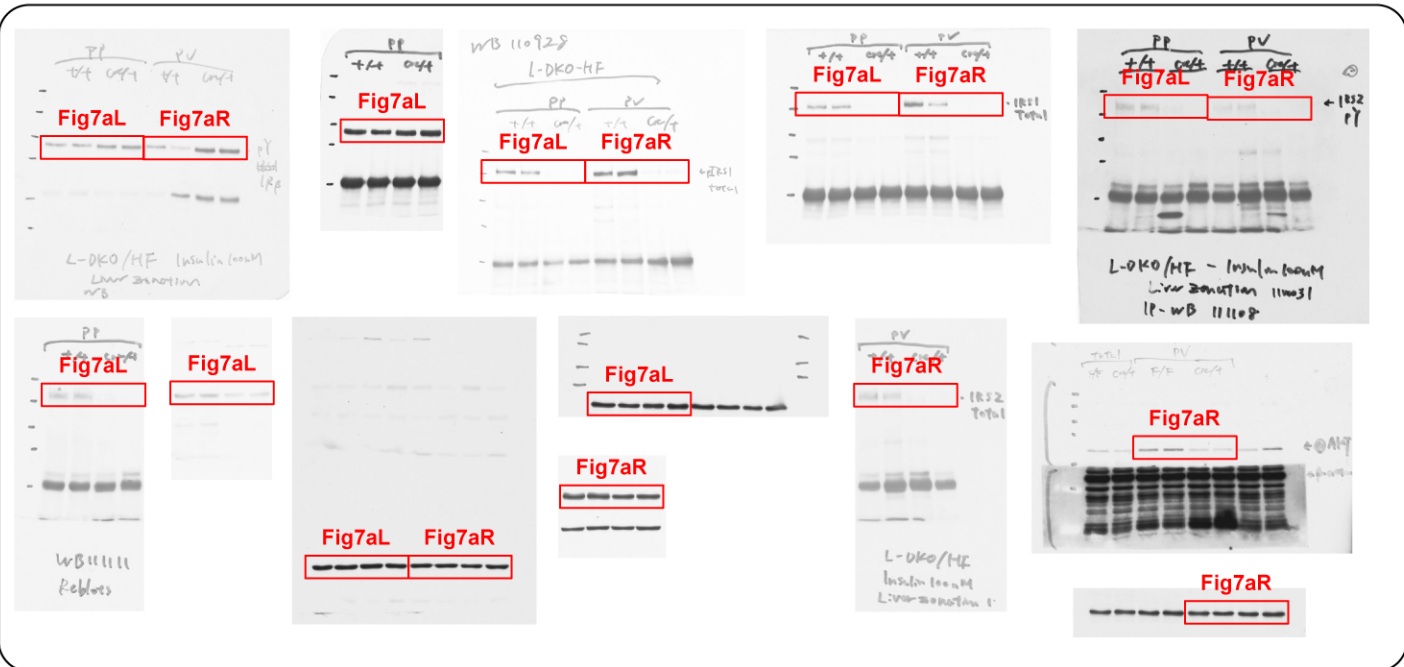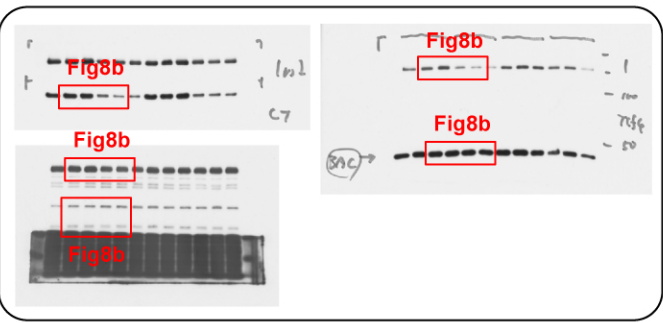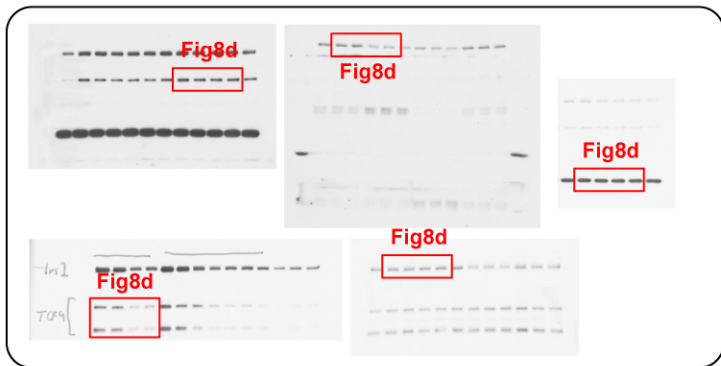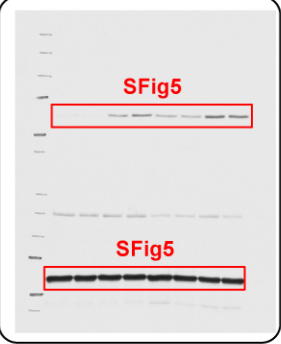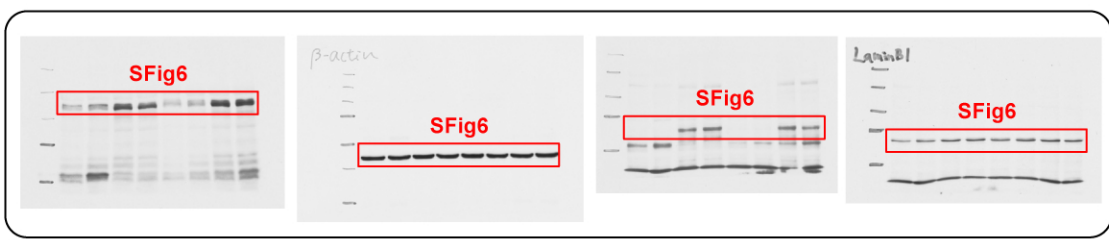

## Supplementary Figure 6.

Uncropped Western blots related to Figure 6, 7, 8 and Supplementary Figure 5, 6

# Supplementary Figure 7

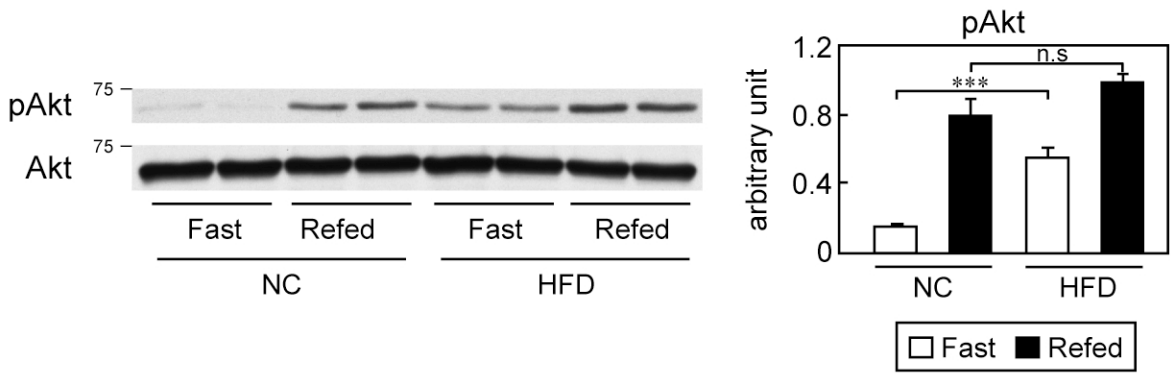

## Supplementary Figure 7.

**Phosphorylation levels of Akt in the fasting state were significantly increased in the mice on a HF diet as compared to those on NC diet**

Phosphorylation levels of Akt in the livers of the NC and HF diet-fed mice under the fasting and fed conditions (n = 4).

Results are expressed as mean  $\pm$  s.e.m. \* $P < 0.05$ , \*\*\* $P < 0.001$ .

# Supplementary Figure 8

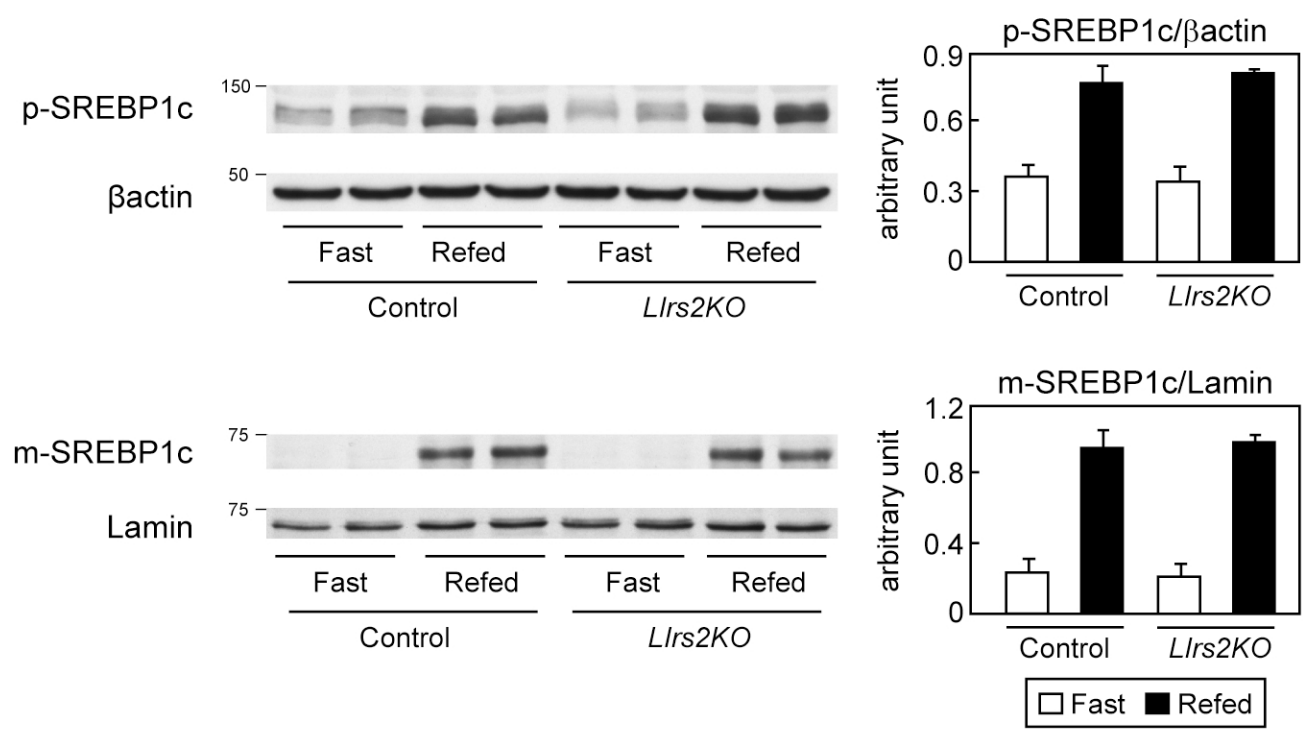

## Supplementary Figure 8.

**Expression levels of the precursor and mature forms of SREBP1c protein did not differ between the control and *LIRS2KO* mice**

Expression levels of the precursor and mature forms of SREBP1c protein in the *LIRS2KO* mice under the fasting and fed conditions (n = 4).

Results are expressed as mean  $\pm$  s.e.m.
